# Supplementary material for: Sensoproteomic Characterization of Lactobacillus Johnsonii-Fermented Pea Protein-Based Beverage: A Promising Strategy for Enhancing Umami and Kokumi Sensations while Mitigating Bitterness
Source: PubMed Central journal article supplement (PMC11261612; doi:10.1021/acs.jafc.4c02317), 2024-07-03
Supplement: jf4c02317_si_001.pdf [file jf4c02317_si_001.pdf]

## Supplementary Materials

# Sensoproteomics characterization of *Lactobacillus johnsonii* fermented pea protein-based beverage: a promising strategy for enhancing umami and kokumi sensations while mitigating bitterness

Andrea Spaccasassi<sup>†</sup>, Lijuan Ye<sup>#</sup>, Christian Rincon<sup>#</sup>, Rosa Aragao Börner<sup>#</sup>, Biljana Bogicevic<sup>#</sup>, Arne Glabasnia<sup>#</sup>, Thomas Hofmann<sup>†</sup>, and Corinna Dawid<sup>^†\*</sup>

<sup>†</sup> Chair of Food Chemistry and Molecular and Sensory Science, TUM School of Life Sciences,  
Technical University of Munich, Lise-Meitner-Str. 34, 85354 Freising, Germany

\* TUM CREATE, 1 CREATE Way, #10-02 CREATE Tower, Singapore, 138602 Singapore

<sup>#</sup> Société des Produits Nestlé S.A., Nestlé Research, Route du Jorat 57, CH 1000 Lausanne  
26, Switzerland

<sup>^</sup> Professorship for Functional Phytometabolomics, TUM School of Life Sciences, Technical  
University of Munich, Lise-Meitner-Str. 34, 85354 Freising, Germany

DKEEEQEEETSKQVQ

m/z 612.61 [M+3H]<sup>3+</sup>

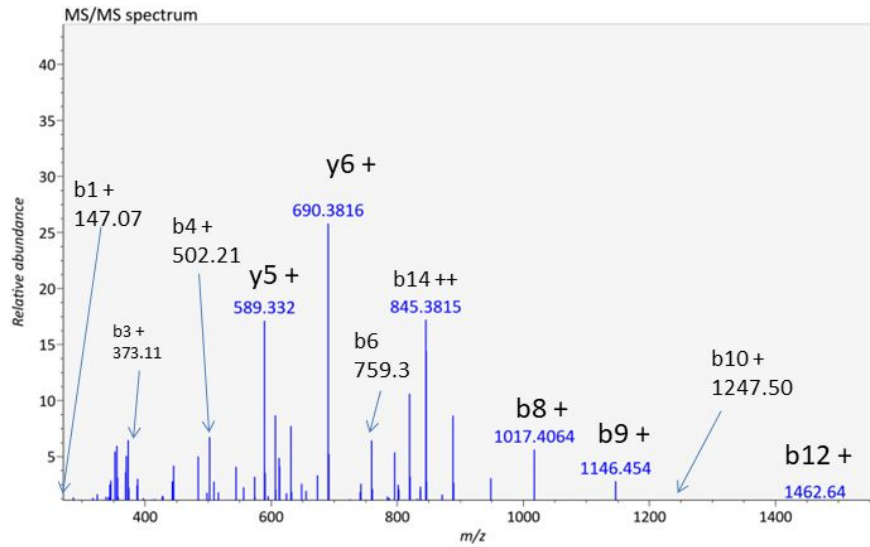

**Figure S1:** Tandem mass spectrometry (MS/MS) fragmentation spectrum of the peptide with sequence DKEEEQEEETSKQVQ. The spectrum displays the relative abundance of detected ions versus the mass-to-charge ratio (m/z). Annotation of b- and y-type fragment ions is indicated, corresponding to the cleavage of peptide bonds. The precursor ion is indicated with a m/z of 612.61 [M+3H]<sup>3+</sup>, suggesting a triply charged state.

# AGEENDNVIS

## m/z 524.23 [M+2H]<sup>2+</sup>

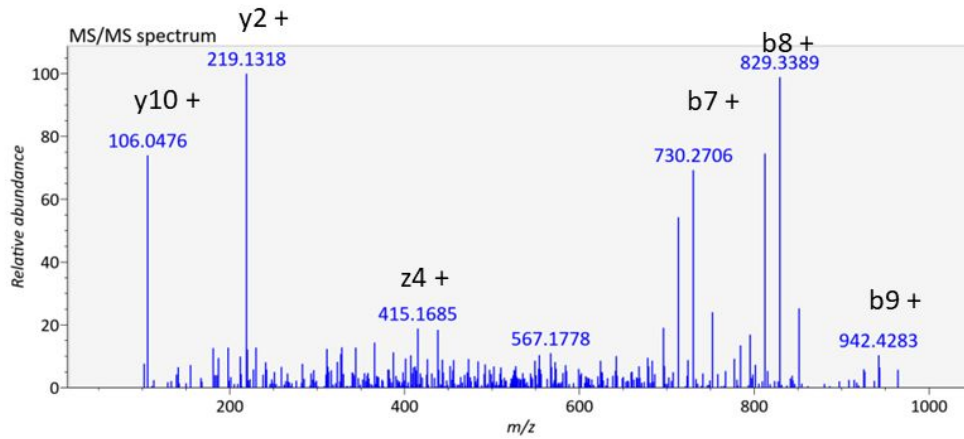

**Figure S2:** Tandem mass spectrometry (MS/MS) fragmentation spectrum of the peptide with sequence AGEENDNVIS. The spectrum displays the relative abundance of detected ions versus the mass-to-charge ratio (m/z). Annotation of b-, z- and y-type fragment ions is indicated, corresponding to the cleavage of peptide bonds. The precursor ion is indicated with a m/z of 612.61 [M+2H]<sup>2+</sup>, suggesting a double charged state.

EENVIVKV  
m/z 929.53 [M+H]<sup>1+</sup>

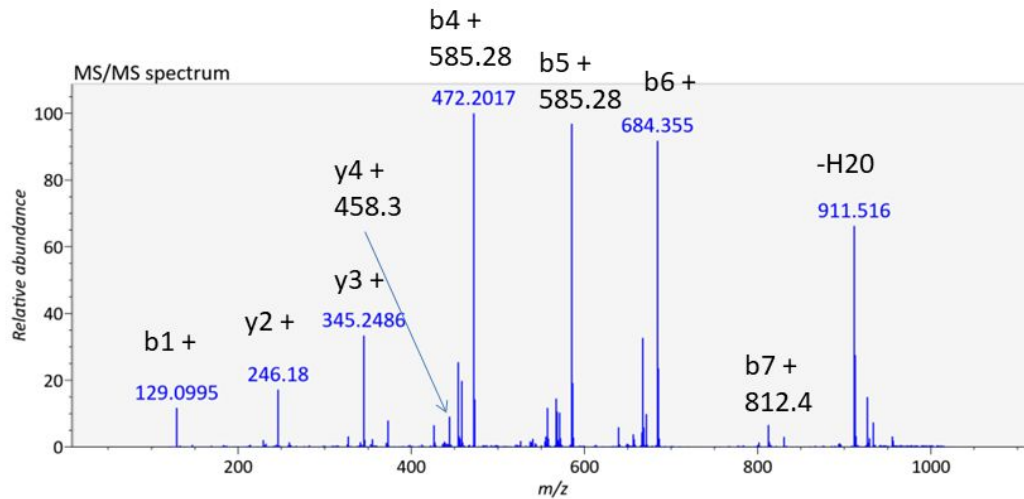

**Figure S3:** Tandem mass spectrometry (MS/MS) fragmentation spectrum of the peptide with sequence EENVIVKV. The spectrum displays the relative abundance of detected ions versus the mass-to-charge ratio (m/z). Annotation of b- and y-type fragment ions is indicated, corresponding to the cleavage of peptide bonds. The precursor ion is indicated with a m/z of 929.53 [M+H]<sup>1+</sup>, suggesting a single charged state.

# GQIEEL

$m/z$  688.35  $[M+H]^+$

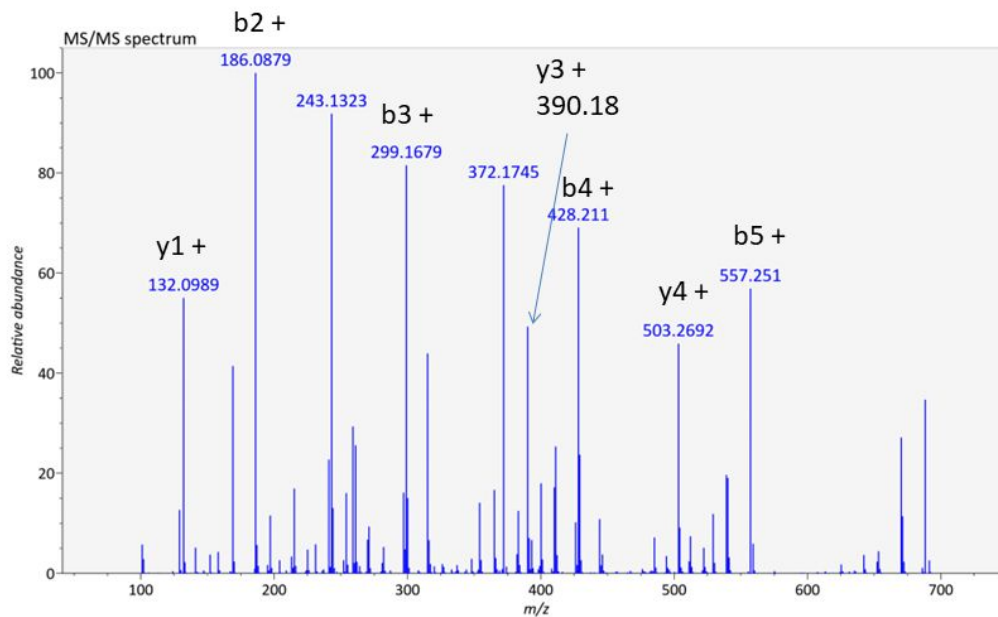

**Figure S4:** Tandem mass spectrometry (MS/MS) fragmentation spectrum of the peptide with sequence GQIEEL. The spectrum displays the relative abundance of detected ions versus the mass-to-charge ratio ( $m/z$ ). Annotation of b- and y-type fragment ions is indicated, corresponding to the cleavage of peptide bonds. The precursor ion is indicated with a  $m/z$  of 688.35  $[M+H]^+$ , suggesting a single charged state.

GSSHEVD  
m/z 730.30 [M+H]<sup>1+</sup>

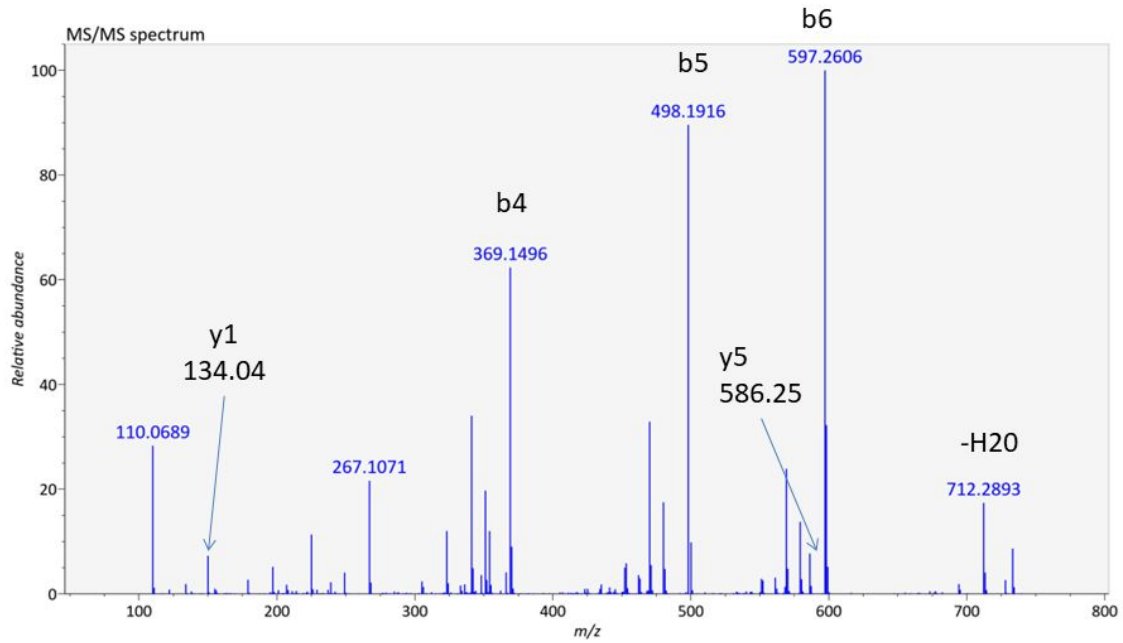

**Figure S5:** Tandem mass spectrometry (MS/MS) fragmentation spectrum of the peptide with sequence GSSHEVD. The spectrum displays the relative abundance of detected ions versus the mass-to-charge ratio (m/z). Annotation of b- and y-type fragment ions is indicated, corresponding to the cleavage of peptide bonds. The precursor ion is indicated with a m/z of 730.30 [M+H]<sup>1+</sup>, suggesting a single charged state.

GSAQEVD  
 $m/z$  705.30  $[M+H]^+$

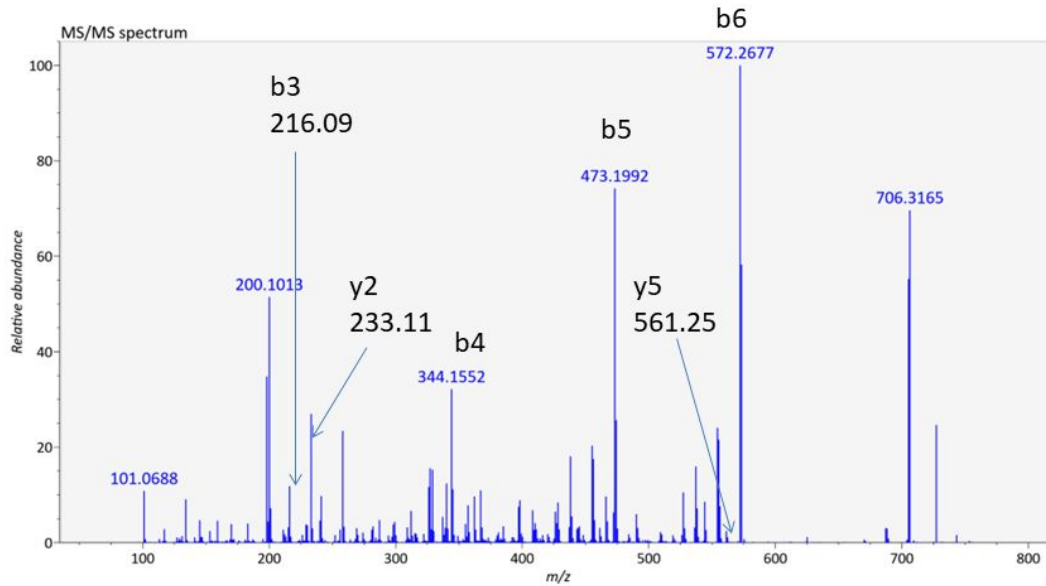

**Figure S6:** Tandem mass spectrometry (MS/MS) fragmentation spectrum of the peptide with sequence GSAQEVD. The spectrum displays the relative abundance of detected ions versus the mass-to-charge ratio ( $m/z$ ). Annotation of b- and y-type fragment ions is indicated, corresponding to the cleavage of peptide bonds. The precursor ion is indicated with a  $m/z$  of 705.30  $[M+H]^+$ , suggesting a single charged state.

SREQIEEL  
m/z 502.25 [M+2H]<sup>2+</sup>

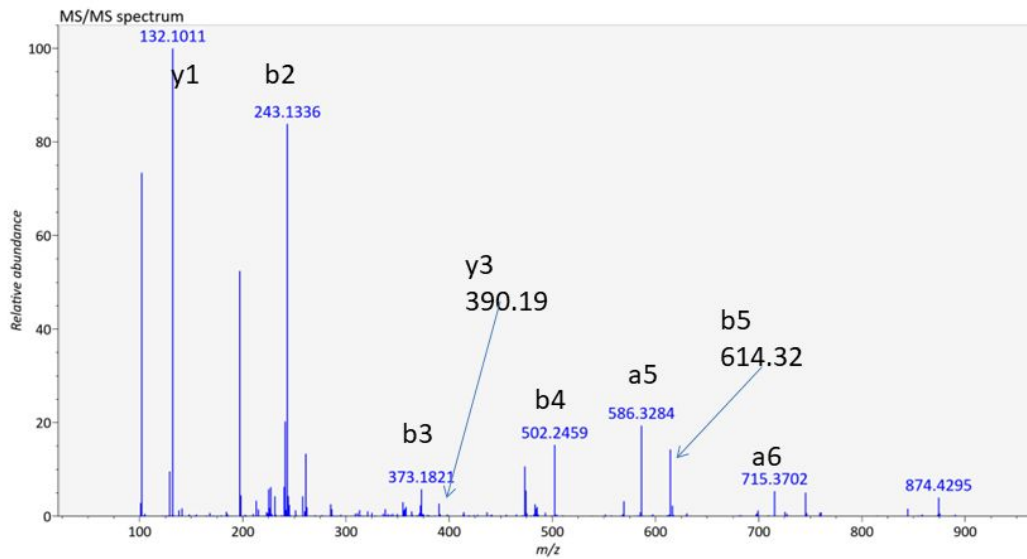

**Figure S7:** Tandem mass spectrometry (MS/MS) fragmentation spectrum of the peptide with sequence SREQIEEL. The spectrum displays the relative abundance of detected ions versus the mass-to-charge ratio (m/z). Annotation of b- and y-type fragment ions is indicated, corresponding to the cleavage of peptide bonds. The precursor ion is indicated with a m/z of 705.30 [M+2H]<sup>2+</sup>, suggesting a single charged state.



**Additional Tables:**

**Table S1.** Compositions of the two raw materials employed to produce the pea beverages.

| <b>Raw material</b>                            | <b>Protein Pea Isolate FYPP-80</b> | <b>Protein Pea Nutralys S85F</b> |
|------------------------------------------------|------------------------------------|----------------------------------|
| Supplier                                       | AGT                                | Roquette                         |
| Protein content in raw material %              | 81.6                               | 84                               |
| Carbohydrate content in raw material %         | 3                                  | 3                                |
| Fat content in raw material %                  |                                    | 6                                |
| Raw material concentration in beverages/100 mL | 10                                 | 10                               |
| Protein content in plant beverage%             | 8.16                               | 8.4                              |
| Carbo content in plant beverage %              | 0.3                                | 0.3                              |
| Fat content %                                  |                                    | 0.6                              |

**Table S2.** Summary of the strains employed, the materials, the P1 and P2 preculture time, the preculture OD, the inoculum (%), the growth conditions, the fermentation time and the fermentation volume.

| <b>Material</b> | <b>NCC Strain</b>   | <b>Species</b>                 | <b>Batch cryostock</b> | <b>Pre-culture time</b> | <b>Preculture OD (for tracking)</b> | <b>Inoculum 1% (mL)</b> | <b>Growth conditions</b> | <b>Fermentation time</b> | <b>Volume in plastic bottle (mL)</b> |
|-----------------|---------------------|--------------------------------|------------------------|-------------------------|-------------------------------------|-------------------------|--------------------------|--------------------------|--------------------------------------|
| FYPP-80         | unfermented         | -                              | -                      | -                       | -                                   | -                       | -                        | -                        | 250                                  |
| FYPP-80         | NCC3033             | <i>Lactobacillus johnsonii</i> | 0EO25                  | P1 48h<br>P2 24h        | 5.4                                 | 3                       | 40°C / static areobic    | 48 h                     | 200                                  |
| FYPP-80         | NCC1584             | <i>Lactobacillus johnsonii</i> | LJ 17<br>14/2/96       | P1 24h<br>P2 24h        | 6.2                                 | 3                       | 40°C / static areobic    | 48 h                     | 200                                  |
| FYPP-80         | NCC1680             | <i>Lactobacillus johnsonii</i> | 0NN25                  | P1 24h<br>P2 24h        | 6.9                                 | 3                       | 40°C / static areobic    | 48 h                     | 200                                  |
| FYPP-80         | NCC2680             | <i>Lactobacillus johnsonii</i> | 0ZI24                  | P1 48h<br>P2 24h        | 9.9                                 | 3                       | 40°C / static areobic    | 48 h                     | 200                                  |
| FYPP-80         | NCC1657             | <i>Lactobacillus johnsonii</i> | 0HS25                  | P1 48h<br>P2 24h        | 9                                   | 3                       | 40°C / static areobic    | 48 h                     | 200                                  |
| FYPP-80         | NCC533              | <i>Lactobacillus johnsonii</i> | 1NA18                  | P1 24h<br>P2 24h        | 9.9                                 | 3                       | 37°C / static areobic    | 48 h                     | 200                                  |
| FYPP-80         | Neg ctrl<br>NCC4007 | <i>Lactobacillus rhamnosus</i> | 1EU14                  | P2 24h                  | 8.6                                 | 3                       | 37°C / static areobic    | 48h                      | 200                                  |
| NS85F           | unfermented         | -                              | -                      | -                       | -                                   | -                       | -                        | -                        | 250                                  |
| NS85F           | NCC3033             | <i>Lactobacillus johnsonii</i> | 0EO25                  | P1 48h<br>P2 24h        | 5.4                                 | 3                       | 40°C / static areobic    | 48 h                     | 200                                  |
| NS85F           | NCC1584             | <i>Lactobacillus johnsonii</i> | LJ 17<br>14/2/96       | P1 24h<br>P2 24h        | 6.2                                 | 3                       | 40°C / static areobic    | 48 h                     | 200                                  |
| NS85F           | NCC1680             | <i>Lactobacillus johnsonii</i> | 0NN25                  | P1 24h<br>P2 24h        | 6.9                                 | 3                       | 40°C / static areobic    | 48 h                     | 200                                  |
| NS85F           | NCC2680             | <i>Lactobacillus johnsonii</i> | 0ZI24                  | P1 48h<br>P2 24h        | 9.9                                 | 3                       | 40°C / static areobic    | 48 h                     | 150                                  |
| NS85F           | NCC1657             | <i>Lactobacillus johnsonii</i> | 0HS25                  | P1 48h<br>P2 24h        | 9                                   | 3                       | 40°C / static areobic    | 48 h                     | 100                                  |
| NS85F           | NCC533              | <i>Lactobacillus johnsonii</i> | 1NA18                  | P1 24h<br>P2 24h        | 9.9                                 | 3                       | 37°C / static areobic    | 48 h                     | 100                                  |

|       |                         |                                              |       |        |     |   |                             |     |     |
|-------|-------------------------|----------------------------------------------|-------|--------|-----|---|-----------------------------|-----|-----|
| NS85F | neg ctrl<br>NCC40<br>07 | <i>Lactobaci<br/>llus<br/>rhamnos<br/>us</i> | 1EU14 | P2 24h | 8.6 | 3 | 37°C /<br>static<br>areobic | 48h | 200 |
|-------|-------------------------|----------------------------------------------|-------|--------|-----|---|-----------------------------|-----|-----|

**Table S3.** Summary of extraction and solid phase extraction (SPE) Yields from pea beverage materials, including solvent usage, material recovery, and desired concentrations for subsequent application in pea beverage formulations

| Variable                                                         | Value    | Unit         |
|------------------------------------------------------------------|----------|--------------|
| Starting volume Pea Beverage                                     | 3400     | mL           |
| Starting material dry                                            | 340      | g in 3400 mL |
| volume of solvent used (50%/50% MeOH/H2O)                        | 1400     | mL           |
| Material obtained from 3 extractions                             | 22.478   | g            |
| yield solvent extraction                                         | 6.611    | %            |
| Extracted Pea Beverage natural concentration                     | 0.1983   | g in 30 mL   |
| 10 g used for SPE fractionation                                  | 10       | g            |
| SPE 1 100 H2O                                                    | 4.126    | g            |
| SPE 2 50%/50% MeOH/H2O                                           | 2.324    | g            |
| SPE 3 100%MeOH                                                   | 0.8932   | g            |
|                                                                  |          |              |
| yield SPE in g                                                   | 7.343    | g            |
| yield SPE in %                                                   | 73.430   | %            |
| SPE 1 100 H2O yields                                             | 2.728    | %            |
| SPE 2 50%/50% MeOH/H2O yields                                    | 1.536    | %            |
| SPE 3 100%MeOH yields                                            | 0.591    | %            |
|                                                                  |          |              |
| Desired volume U1                                                | 30       | mL           |
| Desired volume U2                                                | 30       | mL           |
| Desired volume U3                                                | 30       | mL           |
|                                                                  |          |              |
| Corresponding pea beverage dry material used for SPE             | 151.259  | g            |
| Corresponding volume in beverage 10% used for SPE                | 1512.590 | mL           |
|                                                                  |          |              |
| Desired concentration of SPE1 pea beverage natural concentration | 0.0818   | g in 30mL    |
| Desired concentration of SPE2 pea beverage natural concentration | 0.0461   | g in 30mL    |
| Desired concentration of SPE3 pea beverage natural concentration | 0.0177   | g in 30mL    |

**Table S4.** SWATH method table: MS experiments conducted at each cycle time for each swath window. The upper part of the table reports the SWATH windows for the reverse phase method, whereas the lower part reports the windows for the HILIC method. The HILIC method is acquired up from 50 to 1000 Da, whereas the reversed-phase method is acquired up to 1500 Da.

| <b>experiments<br/>REVERSED<br/>PHASE<br/>METHOD</b> | <b>MS Type</b> | <b>Min <i>m/z</i></b> | <b>Max <i>m/z</i></b> |
|------------------------------------------------------|----------------|-----------------------|-----------------------|
| 0                                                    | TOF SCAN       | 50                    | 1500                  |
| 1                                                    | SWATH          | 49.5                  | 96                    |
| 2                                                    | SWATH          | 95                    | 131                   |
| 3                                                    | SWATH          | 130                   | 159.6                 |
| 4                                                    | SWATH          | 158.6                 | 190.1                 |
| 5                                                    | SWATH          | 189.1                 | 215.6                 |
| 6                                                    | SWATH          | 214.6                 | 243.6                 |
| 7                                                    | SWATH          | 242.6                 | 274.1                 |
| 8                                                    | SWATH          | 273.1                 | 303.6                 |
| 9                                                    | SWATH          | 302.6                 | 341.2                 |
| 10                                                   | SWATH          | 340.2                 | 374.6                 |
| 11                                                   | SWATH          | 373.6                 | 421.8                 |
| 12                                                   | SWATH          | 420.8                 | 453.2                 |
| 13                                                   | SWATH          | 452.2                 | 482.8                 |
| 14                                                   | SWATH          | 481.8                 | 513.8                 |
| 15                                                   | SWATH          | 512.8                 | 543.8                 |
| 16                                                   | SWATH          | 542.8                 | 593.1                 |
| 17                                                   | SWATH          | 592.1                 | 652.8                 |
| 18                                                   | SWATH          | 651.8                 | 705.3                 |
| 19                                                   | SWATH          | 704.3                 | 806.5                 |
| 20                                                   | SWATH          | 805.5                 | 1000.5                |
| 21                                                   | SWATH          | 999.5                 | 1100.5                |
| 22                                                   | SWATH          | 1099.5                | 1200.5                |
| 23                                                   | SWATH          | 1199.5                | 1500                  |
| <b>Experiments<br/>HILIC METHOD</b>                  | <b>MS TYPE</b> | <b>MIN <i>m/z</i></b> | <b>MAX <i>m/z</i></b> |
| 0                                                    | SCAN           | 49.5                  | 1000                  |
| 1                                                    | SWATH          | 49.5                  | 135.5                 |
| 2                                                    | SWATH          | 134.5                 | 186                   |
| 3                                                    | SWATH          | 185                   | 222.5                 |
| 4                                                    | SWATH          | 221.5                 | 247.5                 |
| 5                                                    | SWATH          | 246.5                 | 267.5                 |
| 6                                                    | SWATH          | 266.5                 | 292.5                 |
| 7                                                    | SWATH          | 291.5                 | 315.5                 |
| 8                                                    | SWATH          | 314.5                 | 339.5                 |
| 9                                                    | SWATH          | 338.5                 | 365                   |
| 10                                                   | SWATH          | 364                   | 387.5                 |

|    |       |       |        |
|----|-------|-------|--------|
| 11 | SWATH | 386.5 | 421.5  |
| 12 | SWATH | 420.5 | 462.5  |
| 13 | SWATH | 461.5 | 493.5  |
| 14 | SWATH | 492.5 | 524    |
| 15 | SWATH | 523   | 562.5  |
| 16 | SWATH | 561.5 | 617.5  |
| 17 | SWATH | 616.5 | 669.5  |
| 18 | SWATH | 668.5 | 725.5  |
| 19 | SWATH | 724.5 | 815.5  |
| 20 | SWATH | 814.5 | 1000.5 |

**Table S5.** MRM transitions used for quantitation of long-chain peptides employing LC-MS/MS analysis, retention time (Rt, [min]), quantifier/qualifier Q1/Q3, declustering potential (DP, [V]), entrance potential (EP, [V]) collision energy (CE) and CXP (collision cell exit potential). Common settings for all peptides: EP 10V, DP 80V, Dwell time 15 ms.

| Peptide             | Q1 / Q3       | Rt [min] | DP [V] | EP, [V] | CE [V] | CXP [V] |
|---------------------|---------------|----------|--------|---------|--------|---------|
| EENVIVKV (Q)        | 465.3 / 458.3 | 7.5      | 80     | 10      | 21.8   | 7.5     |
| EENVIVKV            | 465.3 / 246.2 | 7.5      | 80     | 10      | 21.8   | 7.5     |
| REQIEEL (Q)         | 458.7 / 656.3 | 6.9      | 80     | 10      | 21.5   | 6.9     |
| REQIEEL             | 458.7 / 132.1 | 6.9      | 80     | 10      | 21.5   | 6.9     |
| SREQIEEL (Q)        | 502.3 / 743.4 | 6.9      | 80     | 10      | 23.6   | 6.9     |
| SREQIEEL            | 502.3 / 872.4 | 6.9      | 80     | 10      | 23.6   | 6.9     |
| DKEEEQEEETSKQVQ (Q) | 612.6 / 147.1 | 5.2      | 80     | 10      | 27.4   | 5.2     |
| DKEEEQEEETSKQVQ     | 612.6 / 690.4 | 5.2      | 80     | 10      | 27.4   | 5.2     |
| ANAQPLQRE (Q)       | 513.8 / 642.4 | 5.4      | 80     | 10      | 24.2   | 5.4     |
| ANAQPLQRE           | 513.8 / 186.1 | 5.4      | 80     | 10      | 24.2   | 5.4     |
| GQIEEL (Q)          | 688.4 / 428.2 | 7.35     | 80     | 10      | 32.7   | 7.35    |
| GQIEEL              | 688.4 / 557.3 | 7.35     | 80     | 10      | 32.7   | 7.35    |
| GSAQEVD (Q)         | 705.3 / 572.3 | 4.4      | 80     | 10      | 33.6   | 4.4     |

|               |                  |     |    |    |      |     |
|---------------|------------------|-----|----|----|------|-----|
| GSAQEVD       | 705.3 /<br>473.2 | 4.4 | 80 | 10 | 33.6 | 4.4 |
| EVDRLKKN (Q)  | 329.5 /<br>261.2 | 6.1 | 80 | 10 | 13.8 | 6.1 |
| EVDRLKKN      | 329.5 /<br>374.2 | 6.1 | 80 | 10 | 13.8 | 6.1 |
| GQIEELSKN (Q) | 509.3 /<br>186.1 | 6   | 80 | 10 | 24   | 6   |
| GQIEELSKN     | 509.3 /<br>719.4 | 6   | 80 | 10 | 24   | 6   |
| GSSHEVD (Q)   | 365.7 /<br>134.0 | 2.9 | 80 | 10 | 16.9 | 2.9 |
| GSSHEVD       | 365.7 /<br>597.3 | 2.9 | 80 | 10 | 16.9 | 2.9 |
| ELTPE (Q)     | 588.3 /<br>245.1 | 5.9 | 80 | 10 | 27.8 | 5.9 |
| ELTPE         | 588.3 /<br>346.2 | 5.9 | 80 | 10 | 27.8 | 5.9 |
| AGEEDNVIS (Q) | 933.4 /<br>715.3 | 6.9 | 80 | 10 | 44.7 | 6.9 |
| AGEEDNVIS     | 933.4 /<br>828.4 | 6.9 | 80 | 10 | 44.7 | 6.9 |

**Table S6.** Quantitation results of the upregulated metabolites in the extracted pea beverage fermented at 0 h (UEPB), fermented for 24 h (FEPB<sub>24 hours</sub>) and fermented for 48 h (FEPB<sub>48 hours</sub>). The table reports each analyte's concentration at 0h, 24h, and 48h. Samples were run in triplicates, and the mean concentration was reported in  $\mu\text{mol/L}$  with Relative Standard Deviations (RSD [%]).

| Compound and threshold literature source | Category       | Threshold [ $\mu\text{mol/L}$ ] | Concentration [ $\mu\text{mol/L}$ ] (RSD [%]) |                          |                          |
|------------------------------------------|----------------|---------------------------------|-----------------------------------------------|--------------------------|--------------------------|
|                                          |                |                                 | UEPB                                          | FEPB <sub>24 hours</sub> | FEPB <sub>48 hours</sub> |
| <b>Bitter</b>                            |                |                                 |                                               |                          |                          |
| L-Valine <sup>a</sup>                    | Basic tastants | 30000                           | 149.3 ( $\pm$ 7.2)                            | 183.2 ( $\pm$ 12.2)      | 283.5 ( $\pm$ 5.7)       |
| L-Leucine <sup>b</sup>                   | Basic tastants | 12000                           | 132.7 ( $\pm$ 16.0)                           | 164.9 ( $\pm$ 12.3)      | 238.8 ( $\pm$ 14.5)      |
| L-Isoleucine <sup>b</sup>                | Basic tastants | 11000                           | 150.5 ( $\pm$ 8.2)                            | 184.0 ( $\pm$ 11.2)      | 557.5 ( $\pm$ 13.3)      |

|                                        |                |       |                |                 |                |
|----------------------------------------|----------------|-------|----------------|-----------------|----------------|
| L-Phenylalanine                        | Basic tastants | 45000 | 141.2 (± 4.1)  | 245.3 (± 2.5)   | 317.9 (± 5.3)  |
| L-Tyrosine <sup>b</sup>                | Basic tastants | 5000  | 56.8 (± 8.8)   | 137.6 (± 9.2)   | 156.8 (± 2.3)  |
| L-Histidine <sup>b</sup>               | Basic tastants | 48000 | 176.05 (± 7.2) | 196.35 (± 15.3) | 300.7 (± 11.3) |
| L-Lysine <sup>b</sup>                  | Basic tastants | 85000 | 214.9 (± 1.8)  | 328.4 (± 2.3)   | 457.1 (± 5.5)  |
| L-Arginine <sup>b</sup>                | Basic tastants | 75000 | 718.0 (± 7.6)  | 785.5 (± 4.2)   | 830.0 (± 5.9)  |
| Hypoxanthine                           | Basic tastants | 9000  | 200.2 (± 1.1)  | 210.3 (± 6.8)   | 340.3 (± 7.1)  |
| EVDRLKLN                               | Peptides       | 276   | not detected   | 5.15 (± 3.3)    | 18.145 (± 3.6) |
| <b>Sweet</b>                           |                |       |                |                 |                |
| L-Alanine <sup>b</sup>                 | Basic tastants | 8000  | 368.8 (± 5)    | 635.0 (± 4.2)   | 843.5 (± 11.3) |
| L-Proline <sup>b</sup>                 | Basic tastants | 23275 | 61.7 (± 3.5)   | 102.7 (± 7.7)   | 188.3 (± 4.4)  |
| L-Serine <sup>b</sup>                  | Basic tastants | 40000 | 141.9 (± 8.3)  | 301.5 (± 7.2)   | 490.8 (± 6.3)  |
| <b>Umami</b>                           |                |       |                |                 |                |
| L-Glutamic acid <sup>a</sup>           | Basic tastants | 1120  | 662.5 (± 9.3)  | 773.3 (± 3.2)   | 801.0 (± 1.1)  |
| L-Glutamine <sup>a</sup>               | Basic tastants | 50000 | 94.9 (± 13.0)  | 194.3 (± 11.5)  | 288.7 (± 6.2)  |
| L-Aspartic acid <sup>a</sup>           | Basic tastants | 600   | 128.4 (± 9.3)  | 153.0 (± 3.3)   | 263.6 (± 5.6)  |
| L-Asparagine <sup>a</sup>              | Basic tastants | 50000 | 240.2 (± 21.7) | 260.2 (± 16.4)  | 262.1 (± 11.3) |
| Cytidine-5'-monophosphate <sup>d</sup> | Basic tastants | 40000 | 64.45 (± 1.2)  | 387.2 (± 13.0)  | 602.5 (± 9.4)  |

|                                         |                |       |                |                |                |
|-----------------------------------------|----------------|-------|----------------|----------------|----------------|
| Guanosine 5'-monophosphate <sup>d</sup> | Basic tastants | 30000 | 377.5 (± 6.8)  | 541 (± 7.1)    | 626.0 (± 11.3) |
| Uridine 5'-monophosphate <sup>d</sup>   | Basic tastants | 17000 | 116.5 (± 5.0)  | 472.4 (± 3.2)  | 562.5 (± 4.5)  |
| Inosine 5'-monophosphate <sup>d</sup>   | Basic tastants | 5000  | 31.9 (± 2.2)   | 29.5 (± 3.3)   | 38.4 (± 7.8)   |
| <b>Sour</b>                             |                |       |                |                |                |
| L-lactic acid <sup>d</sup>              | Basic tastants | 14000 | 4200           | 20154          | 23010          |
| <b>salt-enhancing</b>                   |                |       |                |                |                |
| Arg-Pro <sup>c</sup>                    | Peptide        | 3.4   | not detected   | 1.1 (± 23.6)   | 1.1 (± 12.3)   |
| Arg-Gly <sup>c</sup>                    | Peptide        | 1.2   | 1.2 (± 21.6)   | 1.3 (± 5.4)    | 1.9 (± 15.2)   |
| pro-Ser                                 | Peptide        | 1300  | 0.117 (± 16.2) | 0.813 (±4.3)   | 7.39 (± 11.2)  |
| <b>Kokumi</b>                           |                |       |                |                |                |
| GSAQEVD                                 | Peptide        | 189   | not detected   | 3.714 (±5.2)   | 11.375 (± 6.3) |
| GQIEEL                                  | Peptide        | 223   | not detected   | 0.3426 (± 7.4) | 2.0885 (±5.2)  |
| GSSHEVD                                 | Peptide        | 102   | not detected   | 3.7 (± 3.5)    | 6.3 (± 11.2)   |
| AGEEDNVIS                               | Peptide        | 198   | not detected   | 0.3 (±2.3)     | 6.7 (± 4.4)    |
| SREQIEEL                                | Peptide        | 177   | not detected   | 0.6 (± 3.6)    | 2.6 (± 4.5)    |
| DKEEEQEEETSKQVQ                         | Peptide        | 46    | not detected   | 0.4 (± 7.7)    | 2.7 (± 8.2)    |

<sup>a</sup> Toeslstede and Hofmann. <sup>2</sup>

<sup>b</sup> Rotzoll, Dunkel, and Hofmann <sup>3</sup>

<sup>c</sup> Schindler et al. <sup>4</sup>

<sup>d</sup> Dunkel et al., <sup>5</sup>.

<sup>e</sup> Salger et al., <sup>6</sup>



**Table S7** Comparative Analysis of Gene Presence in *L. johnsonii* Strains as Identified by BLAST Analysis. This table lists genes compared across different strains of *L. johnsonii*, including their UniProt IDs, GI numbers, gene names, and protein categories. The data is based on research by Liu et al. (2010), employing a stringent e-value threshold of 0.001 and a minimum coverage requirement of 80% for BLAST hits. It includes various protein categories such as ABC transporter systems, aminopeptidases, cell-wall bound proteinases, di/tripeptides uptake proteins, dipeptidases, endopeptidases, oligopeptides uptake components, proline peptidases, and tripeptidases.

| UniProt ID | GI number | Gene Name | Protein Category           |
|------------|-----------|-----------|----------------------------|
| A0A3G2JVM7 | 42519394  | OppA      | ABC transporter system     |
| A0A4Y9IGT3 | 42519448  | OppA      | ABC transporter system     |
| A0A7D9N5R4 | 42519448  | OppA      | ABC transporter system     |
| F4AG66     | 42519448  | OppA      | ABC transporter system     |
| Q74HU5     | 42519699  | OppA      | ABC transporter system     |
| Q74IJ4     | 42519448  | OppA      | ABC transporter system     |
| Q74IP6     | 42519395  | OppA      | ABC transporter system     |
| Q74IP7     | 42519394  | OppA      | ABC transporter system     |
| A0A137PMA8 | 42519469  | PepM      | Aminopeptidase             |
| A0A355X176 | 42518488  | PepC      | Aminopeptidase             |
| A0A4Y9ICH0 | 42518641  | PepC      | Aminopeptidase             |
| A0A4Y9IDT6 | 42519847  | Pcp       | Aminopeptidase             |
| Q74HE9     | 42519847  | Pcp       | Aminopeptidase             |
| Q74IH3     | 42519469  | PepM      | Aminopeptidase             |
| Q74II4     | 42519458  | PepN      | Aminopeptidase             |
| Q74KM5     | 42518649  | PepA      | Aminopeptidase             |
| Q74KN3     | 42518641  | PepC      | Aminopeptidase             |
| Q74KN6     | 42518638  | PepC      | Aminopeptidase             |
| Q74L31     | 42518488  | PepC      | Aminopeptidase             |
| P60810     | 42519890  | PrtM      | cell-wall bound proteinase |
| Q74HA7     | 42519889  | PrtP      | cell-wall bound proteinase |
| Q74KK7     | 42518667  | DtpT      | di/tripeptides uptake      |
| A0A137PNU7 | 42518589  | PepV      | dipeptidase                |
| A0A1B3PW14 | 42518668  | PepD      | dipeptidase                |
| A0A244CDU7 | 42519390  | PepD      | dipeptidase                |
| F4AFA0     | 42518589  | PepV      | dipeptidase                |
| Q74HL4     | 42519780  | PepD      | dipeptidase                |
| Q74HX2     | 42519672  | PepD      | dipeptidase                |

|            |          |           |                      |
|------------|----------|-----------|----------------------|
| Q74IQ1     | 42519390 | PepD      | dipeptidase          |
| Q74KK6     | 42518668 | PepD      | dipeptidase          |
| Q74KN4     | 42518640 | PepD      | dipeptidase          |
| Q74KT4     | 42518589 | PepV      | dipeptidase          |
| Q74LC6     | 42518345 | PepD      | dipeptidase          |
| A0A137PNQ2 | 42518264 | PepE/PepG | endopeptidase        |
| A0A4Y9IF91 | 42519446 | PepE/PepG | endopeptidase        |
| Q74HQ0     | 42519744 | PepF      | endopeptidase        |
| Q74IJ6     | 42519446 | PepE/PepG | endopeptidase        |
| Q74J14     | 42519221 | PepO      | endopeptidase        |
| Q74LK7     | 42518264 | PepE/PepG | endopeptidase        |
| Q74LK9     | 42518262 | PepE/PepG | endopeptidase        |
| Q74LN6     | 42518233 | PepO      | endopeptidase        |
| Q74M04     | 42518115 | PepO      | endopeptidase        |
| A0A1B3PWC6 | 42519399 | OppD      | oligopeptides uptake |
| A0A1B3PWD2 | 42519398 | OppF      | oligopeptides uptake |
| A0A267M6Z5 | 42519396 | OppC      | oligopeptides uptake |
| A0A267M7N0 | 42519397 | OppB      | oligopeptides uptake |
| F4AGJ2     | 42519399 | OppD      | oligopeptides uptake |
| F4AGJ3     | 42519398 | OppF      | oligopeptides uptake |
| Q74IP2     | 42519399 | OppD      | oligopeptides uptake |
| Q74IP3     | 42519398 | OppF      | oligopeptides uptake |
| Q74IP4     | 42519397 | OppB      | oligopeptides uptake |
| Q74IP5     | 42519396 | OppC      | oligopeptides uptake |
| A0A244CDX9 | 42519426 | PepP      | Proline peptidase    |
| A0A244CJQ4 | 42518140 | PepR      | Proline peptidase    |
| A0A3G2JVS5 | 42519459 | PepX      | Proline peptidase    |
| A0A4Y9ICR3 | 42518586 | PepQ      | Proline peptidase    |
| F4AG55     | 42519459 | PepX      | Proline peptidase    |
| Q74II3     | 42519459 | PepX      | Proline peptidase    |
| Q74IL6     | 42519426 | PepP      | Proline peptidase    |

|            |          |      |                   |
|------------|----------|------|-------------------|
| Q74KT7     | 42518586 | PepQ | Proline peptidase |
| Q74LX9     | 42518140 | PepR | Proline peptidase |
| A0A137PPM8 | 42519228 | PepT | tripeptidase      |
| A0A6P1Y878 | 42519680 | PepT | tripeptidase      |
| A0A7D9N7R4 | 42519680 | PepT | tripeptidase      |
| Q74HW4     | 42519680 | PepT | tripeptidase      |
| Q74J07     | 42519228 | PepT | tripeptidase      |

**Table S8.** Evaluation of Peptide Sequences from Pea Protein Hydrolysates for Sensory Attributes Using iUmami and iBitter Sequence-Composition Models (SCM).<sup>7,8</sup> This table includes peptide length, fraction assignment, umami scores, predicted umami attributes, bitterness scores, and predicted bitterness attributes for sequences identified exclusively in the 48-hour fermented taste-active SPE fractions F1 and F2, except for the sequence ANAQPLQRE, which was unique to the SPE unfermented fraction U2

| Sequence        | Length | fraction | iUmami SCM score | iUmami SCM predicted attribute | iBitterSCM score | iBitter SCM |
|-----------------|--------|----------|------------------|--------------------------------|------------------|-------------|
| GQIEEL          | 6      | F1       | 611.2            | Umami                          | 304.4            | non-Bitter  |
| GSAQEVD         | 7      | F1       | 630.17           | Umami                          | 323.67           | non-Bitter  |
| EVDRLKLN        | 8      | F2       | 593.43           | Umami                          | 306.86           | non-Bitter  |
| GQIEELSKN       | 9      | F2       | 644.88           | Umami                          | 313.38           | non-Bitter  |
| GSSHEVD         | 7      | F1       | 624.33           | Umami                          | 326.83           | non-Bitter  |
| ELTPE           | 5      | F1       | 637.5            | Umami                          | 352.25           | Bitter      |
| AGEEDNVIS       | 9      | F1       | 660.75           | Umami                          | 413.25           | Bitter      |
| EENVIVKV        | 8      | F2       | 631.57           | Umami                          | 363.14           | Bitter      |
| REQIEEL         | 7      | F1       | 677.83           | Umami                          | 348.67           | Bitter      |
| SREQIEEL        | 8      | F1       | 673.86           | Umami                          | 346.71           | Bitter      |
| DKEEEQEEETSKQVQ | 15     | F1       | 716.21           | Umami                          | 342.64           | Bitter      |
| ANAQPLQRE       | 9      | U2       | 585.5            | non-Umami                      | 341.88           | Bitter      |

**Table S9.** BLAST scores, raw data. The provided table outlines the results obtained from the results obtained from the process where protein sequences were search through BLAST (Basic Local Alignment Search Tool) to compare against genomes of *L. johnsonii* strains, focusing on identifying the presence of specific genes within these strains. The criteria for selecting significant BLAST hits included e-value threshold of 0.001 and a minimum coverage of 80% relative to the query sequence. These data points, were then used to construct heatmaps, providing a visual representation of the genetic similarity and diversity among the *L. johnsonii* strains tested.

| Gene       | NCC1584 | NCC1657 | NCC1680 | NCC2680 | NCC3033 | NCC533 |
|------------|---------|---------|---------|---------|---------|--------|
| P60810     | 44.238  | 100     | 44.61   | 100     | 96.98   | 100    |
| Q74HE9     | 99.07   | 100     | 97.674  | 100     | 95.814  | 100    |
| A0A137PMA8 | 99.635  | 100     | 99.27   | 100     | 98.175  | 100    |
| A0A137PNQ2 | 99.541  | 100     | 99.312  | 100     | 97.936  | 100    |
| A0A137PNU7 | 99.785  | 100     | 99.14   | 100     | 98.065  | 100    |
| A0A137PPM8 | 99.759  | 100     | 99.036  | 100     | 98.072  | 100    |
| A0A1B3PW14 | 100     | 100     | 59.914  | 100     | 92.949  | 100    |
| A0A1B3PWC6 | 99.702  | 99.702  | 99.107  | 99.702  | 98.512  | 99.702 |
| A0A1B3PWD2 | 100     | 100     | 98.137  | 100     | 97.516  | 100    |
| A0A244CDU7 | 100     | 100     | 98.523  | 100     | 96.835  | 100    |
| A0A244CDX9 | 100     | 100     | 99.187  | 100     | 93.767  | 100    |
| A0A244CJQ4 | 100     | 100     | 99.342  | 100     | 96.711  | 100    |
| A0A267M6Z5 | 99.671  | 100     | 97.368  | 100     | 93.75   | 100    |
| A0A267M7N0 | 100     | 100     | 97.377  | 100     | 97.705  | 100    |
| A0A355X176 | 100     | 100     | 98.886  | 100     | 100     | 100    |
| A0A3G2JVM7 | 99.825  | 100     | 98.953  | 100     | 98.255  | 100    |
| A0A3G2JVS5 | 98.741  | 100     | 98.741  | 100     | 96.096  | 100    |
| A0A4Y9ICH0 | 97.279  | 100     | 77.626  | 100     | 91.837  | 100    |
| A0A4Y9ICR3 | 98.641  | 100     | 98.913  | 100     | 95.924  | 100    |
| A0A4Y9IDT6 | 99.07   | 100     | 97.674  | 100     | 95.814  | 100    |
| A0A4Y9IF91 | 99.543  | 100     | 97.717  | 100     | 94.749  | 100    |
| A0A4Y9IGT3 | 59.829  | 100     | 97.089  | 100     | 89.555  | 100    |
| A0A6P1Y878 | 97.877  | 100     | 96.226  | 100     | 86.792  | 100    |
| A0A7D9N5R4 | 59.829  | 100     | 97.089  | 100     | 89.555  | 100    |
| A0A7D9N7R4 | 97.877  | 100     | 96.226  | 100     | 86.792  | 100    |
| F4AFA0     | 99.785  | 100     | 99.14   | 100     | 98.065  | 100    |
| F4AG55     | 98.741  | 100     | 98.741  | 100     | 96.096  | 100    |
| F4AG66     | 59.829  | 100     | 97.089  | 100     | 89.555  | 100    |
| F4AGJ2     | 99.702  | 99.702  | 99.107  | 99.702  | 98.512  | 99.702 |
| F4AGJ3     | 100     | 100     | 98.137  | 100     | 97.516  | 100    |
| Q74HA7     | 0       | 100     | 0       | 100     | 82.944  | 100    |
| Q74HL4     | 99.149  | 100     | 96.383  | 100     | 91.277  | 100    |
| Q74HQ0     | 99.169  | 100     | 97.674  | 100     | 89.149  | 100    |
| Q74HU5     | 98.459  | 100     | 96.364  | 100     | 94.027  | 100    |
| Q74HW4     | 97.877  | 100     | 96.226  | 100     | 86.792  | 100    |
| Q74HX2     | 98.742  | 100     | 98.113  | 100     | 95.388  | 100    |
| Q74IH3     | 99.635  | 100     | 99.27   | 100     | 98.175  | 100    |
| Q74II3     | 98.741  | 100     | 98.741  | 100     | 96.096  | 100    |

|        |        |        |        |        |        |        |
|--------|--------|--------|--------|--------|--------|--------|
| Q74II4 | 99.052 | 100    | 98.815 | 100    | 94.431 | 100    |
| Q74IJ4 | 59.829 | 100    | 97.089 | 100    | 89.555 | 100    |
| Q74IJ6 | 99.543 | 100    | 97.717 | 100    | 94.749 | 100    |
| Q74IL6 | 100    | 100    | 99.187 | 100    | 93.767 | 100    |
| Q74IP2 | 99.702 | 99.702 | 99.107 | 99.702 | 98.512 | 99.702 |
| Q74IP3 | 100    | 100    | 98.137 | 100    | 97.516 | 100    |
| Q74IP4 | 100    | 100    | 97.377 | 100    | 97.705 | 100    |
| Q74IP5 | 99.671 | 100    | 97.368 | 100    | 93.75  | 100    |
| Q74IP6 | 95.034 | 100    | 98.288 | 100    | 71.453 | 100    |
| Q74IP7 | 99.825 | 100    | 98.953 | 100    | 98.255 | 100    |
| Q74IQ1 | 100    | 100    | 98.523 | 100    | 96.835 | 100    |
| Q74J07 | 99.759 | 100    | 99.036 | 100    | 98.072 | 100    |
| Q74J14 | 27.579 | 99.443 | 23.251 | 99.443 | 98.145 | 99.443 |
| Q74KK6 | 100    | 100    | 59.914 | 100    | 92.949 | 100    |
| Q74KK7 | 99.195 | 100    | 98.793 | 100    | 97.183 | 100    |
| Q74KM5 | 100    | 100    | 99.167 | 100    | 0      | 100    |
| Q74KN3 | 97.279 | 100    | 77.626 | 100    | 91.837 | 100    |
| Q74KN4 | 97.046 | 100    | 43.312 | 100    | 94.726 | 100    |
| Q74KN6 | 99.546 | 100    | 88.209 | 100    | 86.652 | 100    |
| Q74KT4 | 99.785 | 100    | 99.14  | 100    | 98.065 | 100    |
| Q74KT7 | 98.641 | 100    | 98.913 | 100    | 95.924 | 100    |
| Q74L31 | 100    | 100    | 98.886 | 100    | 100    | 100    |
| Q74LC6 | 100    | 100    | 98.938 | 100    | 97.028 | 100    |
| Q74LK7 | 99.541 | 100    | 99.312 | 100    | 97.936 | 100    |
| Q74LK9 | 97.025 | 100    | 98.398 | 100    | 94.279 | 100    |
| Q74LN6 | 99.23  | 100    | 99.23  | 100    | 95.532 | 100    |
| Q74LX9 | 100    | 100    | 99.342 | 100    | 96.711 | 100    |
| Q74M04 | 51.389 | 100    | 98.113 | 100    | 51.562 | 100    |

## REFERENCES

- (1) MacLean, B.; Tomazela, D. M.; Shulman, N.; Chambers, M.; Finney, G. L.; Frewen, B.; Kern, R.; Tabb, D. L.; Liebler, D. C.; MacCoss, M. J. Skyline: An Open Source Document Editor for Creating and Analyzing Targeted Proteomics Experiments. *Bioinformatics* **2010**, *26* (7), 966–968. <https://doi.org/10.1093/bioinformatics/btq054>.
- (2) Toelstede, S.; Hofmann, T. Quantitative Studies and Taste Re-Engineering Experiments toward the Decoding of the Nonvolatile Sensometabolome of Gouda Cheese. *J Agric Food Chem* **2008**, *56* (13), 5299–5307.
- (3) Rotzoll, N.; Dunkel, A.; Hofmann, T. Activity-Guided Identification of (S)-Malic Acid 1-O-D-Glucopyranoside (Morelid) and  $\gamma$ -Aminobutyric Acid as Contributors to Umami Taste and Mouth-Drying Oral Sensation of Morel Mushrooms (*Morchella Deliciosa* Fr.). *J Agric Food Chem* **2005**, *53* (10), 4149–4156. <https://doi.org/10.1021/jf050056i>.
- (4) Schindler, A.; Dunkel, A.; Stähler, F.; Backes, M.; Ley, J.; Meyerhof, W.; Hofmann, T. Discovery of Salt Taste Enhancing Arginyl Dipeptides in Protein Digests and Fermented Fish Sauces by Means of a Sensomics Approach. *J Agric Food Chem* **2011**, *59* (23), 12578–12588. <https://doi.org/10.1021/jf2041593>.
- (5) Dunkel, A.; Hofmann, T. Sensory-Directed Identification of  $\beta$ -Alanyl Dipeptides as Contributors to the Thick-Sour and White-Meaty Orosensation Induced by Chicken Broth. *J Agric Food Chem* **2009**, *57* (21), 9867–9877. <https://doi.org/10.1021/jf900948r>.
- (6) Salger, M.; Stark, T. D.; Hofmann, T. Taste Modulating Peptides from Overfermented Cocoa Beans. *J Agric Food Chem* **2019**, *67* (15), 4311–4320. <https://doi.org/10.1021/acs.jafc.9b00905>.
- (7) Charoenkwan, P.; Yana, J.; Schaduengrat, N.; Nantasenamat, C.; Hasan, M. M.; Shoombuatong, W. IBitter-SCM: Identification and Characterization of Bitter Peptides Using a Scoring Card Method with Propensity Scores of Dipeptides. *Genomics* **2020**, *112* (4), 2813–2822. <https://doi.org/10.1016/j.ygeno.2020.03.019>.
- (8) Charoenkwan, P.; Yana, J.; Nantasenamat, C.; Hasan, M. M.; Shoombuatong, W. IUmami-SCM: A Novel Sequence-Based Predictor for Prediction and Analysis of Umami Peptides Using a Scoring Card Method with Propensity Scores of Dipeptides. *J Chem Inf Model* **2020**, *60* (12), 6666–6678. <https://doi.org/10.1021/acs.jcim.0c00707>.
